# Supplementary material
Source: PubMed Central journal article supplement (PMC6439689)
Supplement: jamacardiol-4-16-s001.pdf [file jamacardiol-4-16-s001.pdf]

## Supplementary Online Content

Kundi H, Popma JJ, Khabbaz KR, et al. Association of hospital surgical aortic valve replacement quality with 30-day and 1-year mortality after transcatheter aortic valve replacement. *JAMA Cardiol*. Published online December 5, 2018. doi:10.1001/jamacardio.2018.4051

**eTable 1.** Exclusion criteria

**eTable 2.** Administrative codes used to define covariates

**eTable 3.** Observed 30-day and 1-year TAVR Mortality Rates after exclusion of hospitals performing fewer than 10 TAVRs during the study period among SAVR quality quartiles

This supplementary material has been provided by the authors to give readers additional information about their work.

**eTable 1.** Exclusion criteria

|                                                                                                      | ICD-9-Code                                                                                                                               |
|------------------------------------------------------------------------------------------------------|------------------------------------------------------------------------------------------------------------------------------------------|
| Concomitant valve surgery or Coronary artery bypass graft surgery (procedure codes present at index) | 35.1* 35.20 35.22 35.23 35.24 35.25 35.26 35.27 35.28<br>35.3* 35.91 35.92 35.93 35.94 35.95 35.96 35.98 35.99<br>36.1* 36.2 36.3* 36.9* |

**eTable 2.** Administrative codes used to define covariates

|                                             | ICD-9-Code                                                                                                                                                                                                                                                                                           |
|---------------------------------------------|------------------------------------------------------------------------------------------------------------------------------------------------------------------------------------------------------------------------------------------------------------------------------------------------------|
| Congestive heart failure                    | 398.91, 402.01, 402.11, 402.91, 404.01, 404.03, 404.11, 404.13, 404.91, 404.93, 428.0- 428.9                                                                                                                                                                                                         |
| Cardiac arrhythmias                         | 426.13 426.10 426.12 426.0 426.7 426.9 427.0 427.1<br>427.2 427.3 427.4 427.6 427.8 427.9 785.0 V450 V53.3                                                                                                                                                                                           |
| Pulmonary circulation disorders             | 415.11- 415.19, 416.0- 416.9, 417.9                                                                                                                                                                                                                                                                  |
| Peripheral vascular disorders               | 440-440.9, 441.00- 441.9, 442.0- 442.9, 443.1- 443.9, 444.21- 444.22, 447.1, 449, 557.1, 557.9, V43.4                                                                                                                                                                                                |
| Hypertension, complicated and uncomplicated | 401.1, 401.9, 642.00- 642.04, 401.0, 402.00- 405.99, 437.2, 642.10- 642.24, 642.70- 642.94                                                                                                                                                                                                           |
| Paralysis                                   | 342.0- 344.9, 438.20- 438.53, 780.72                                                                                                                                                                                                                                                                 |
| Other neurological disorders                | 330.1- 331.9, 332.0, 333.4, 333.5, 333.71, 333.72, 333.79, 333.85, 333.94, 334.0- 335.9, 338.0, 340, 341.1- 341.9, 345.00- 345.11, 345.2- 345.3, 345.40- 345.91, 347.00- 347.01, 347.10- 347.11, 649.40- 649.44, 768.7, 768.70, 768.71, 768.72, 780.3, 780.31, 780.32, 780.33, 780.39, 780.97, 784.3 |
| Chronic pulmonary disease                   | 490-492.8, 493.00- 493.92, 494-494.1, 495.0-505, 506.4                                                                                                                                                                                                                                               |
| Diabetes, uncomplicated                     | 249.00- 249.31, 250.00- 250.33, 648.00- 648.04                                                                                                                                                                                                                                                       |
| Diabetes with chronic complications         | 249.40- 249.91, 250.40- 250.93, 775.1                                                                                                                                                                                                                                                                |
| Hypothyroidism                              | 243-244.2, 244.8, 244.9                                                                                                                                                                                                                                                                              |
| Renal failure                               | 403.01, 403.11, 403.90, 403.91, 404.02, 404.03, 404.12, 404.13, 404.92, 404.93, 585.3, 585.4, 585.5, 585.6, 585.9, 586, V42.0, V45.1, V45.11, V45.12, V56.0- V56.32, V56.8                                                                                                                           |
| Liver disease                               | 070.22, 070.23, 070.32, 070.33, 070.44, 070.54, 456.0, 456.1, 456.20, 456.21, 571.0, 571.2, 571.3, 571.40- 571.49, 571.5, 571.6, 571.8, 571.9, 572.3, 572.8, 573.5, V42.7                                                                                                                            |
| Peptic ulcer disease excluding bleeding     | 531.41, 531.51, 531.61, 531.70, 531.71, 531.91, 532.41, 532.51, 532.61, 532.70, 532.71, 532.91, 533.41, 533.51, 533.61, 533.70, 533.71, 533.91, 534.41, 534.51, 534.61, 534.70, 534.71, 534.91                                                                                                       |
| Acquired immune deficiency syndrome         | 042-044.9                                                                                                                                                                                                                                                                                            |

|                                                 |                                                                                                      |
|-------------------------------------------------|------------------------------------------------------------------------------------------------------|
| Lymphoma                                        | 200.00- 202.38, 202.50- 203.01, 203.02- 203.82, 203.8-203.81, 238.6, 273.3                           |
| Metastatic cancer                               | 196.0- 199.1, 209.70, 209.71, 209.72, 209.73, 209.74, 209.75, 209.79, 789.51                         |
| Solid tumor without metastasis                  | 140.0- 172.9, 174.0- 175.9, 179-195.8, 209.00- 209.24, 209.25- 209.3, 209.30- 209.36, 258.01- 258.03 |
| Rheumatoid arthritis/collagen vascular diseases | 701.0, 710.0- 710.9, 714.0- 714.9, 720.0- 720.9, 725                                                 |
| Coagulopathy                                    | 286.0- 286.9, 287.1, 287.3- 287.5, 289.84, 649.30- 649.34                                            |
| Obesity                                         | 278.0, 278.00, 278.01, 278.03, 649.10- 649.14, 793.91, V85.30- V85.39, V85.41- V85.45, V85.54        |
| Weight loss                                     | 260-263.9, 783.21, 783.22                                                                            |
| Fluid and electrolyte disorders                 | 276.0- 276.9                                                                                         |
| Blood loss anemia                               | 280.0, 648.20- 648.24                                                                                |
| Deficiency anemias                              | 280.1- 281.9, 285.21- 285.29, 285.9                                                                  |
| Alcohol abuse                                   | 291.0- 291.3, 291.5, 291.8, 291.81, 291.82, 291.89, 291.9, 303.00- 303.93, 305.00- 305.03            |
| Drug abuse                                      | 292.0, 292.82- 292.89, 292.9, 304.00- 304.93, 305.20- 305.93, 648.30- 648.34                         |
| Psychoses                                       | 295.00- 298.9, 299.10, 299.11                                                                        |
| Depression                                      | 300.4, 301.12, 309.0, 309.1, 311                                                                     |

**eTable 3:** Observed 30-day and 1-year TAVR Mortality Rates after exclusion of hospitals performing fewer than 10 TAVRs during the study period among SAVR quality quartiles

|                  | Quartile 1    | Quartile 2    | Quartile 3    | Quartile 4    | p-value |
|------------------|---------------|---------------|---------------|---------------|---------|
|                  | n=19,754      | n=7,568       | n=10,072      | n=14,221      |         |
| 30-day Mortality | 914 (4.6%)    | 375 (5.0%)    | 513 (5.1%)    | 795 (5.6%)    | <0.001  |
| 1-year Mortality | 3,344 (17.0%) | 1,320 (17.5%) | 1,834 (18.2%) | 2,643 (18.6%) | <0.001  |
